# Supplementary material for: Psychiatrist Participation in Private Health Insurance Markets: Paucity in the Land of Plenty
Source: Atypon-hosted journal article supplement (doi:10.1176/appi.ps.202000022), 2020-08-19
Supplement: appi.ps.202000022.ds001.pdf [file appi.ps.202000022.ds001.pdf]

## **Psychiatrist Participation in Private Health Insurance Markets: Paucity in the Land of Plenty**

### **Online Supplement**

**Table.** Characteristics of licensed psychiatrists with a Massachusetts address who participate in the insurance market with at least one outpatient and 300 outpatients

**Table.** Factors associated with having at least one outpatient claim paid by non-commercial versus group commercial plans

**Table.** Psychiatrists with an active Massachusetts medical license and Massachusetts address who do and do not participate in traditional Medicare

**Table.** Paid amounts in \$ to psychiatrists licensed in Massachusetts with Massachusetts addresses by insurance type

**Figure.** Number of claims per patient per psychiatrist with an active in Massachusetts medical license and a Massachusetts address

**Table.** Characteristics of licensed psychiatrists with a Massachusetts address who participate in the insurance market with at least one (N=1,843) and 300 outpatients (N=151)

|                                                                                        | <b>Group<br/>Commercial<br/>N=1,720</b> |          | <b>Medicare<br/>Advantage<br/>N=597</b> |          | <b>Marketplace<br/>Plans<br/>N=616</b> |          | <b>Medicaid<br/>Managed Care<br/>N=602</b> |          |
|----------------------------------------------------------------------------------------|-----------------------------------------|----------|-----------------------------------------|----------|----------------------------------------|----------|--------------------------------------------|----------|
| <b>Characteristics of psychiatrists<br/>with at least one outpatient<br/>(N=1,843)</b> | <b>N</b>                                | <b>%</b> | <b>N</b>                                | <b>%</b> | <b>N</b>                               | <b>%</b> | <b>N</b>                                   | <b>%</b> |
| Average years since medical school graduation (years)                                  | 27.8                                    |          | 29.9                                    |          | 28.0                                   |          | 27.5                                       |          |
| Years since medical school graduation                                                  |                                         |          |                                         |          |                                        |          |                                            |          |
| 0-6 years                                                                              | 65                                      | 4.1      | 18                                      | 3.3      | 19                                     | 3.5      | 17                                         | 3.1      |
| 7-19 years                                                                             | 362                                     | 23.0     | 79                                      | 14.6     | 126                                    | 23.1     | 137                                        | 25.2     |
| 20-29 years                                                                            | 447                                     | 28.3     | 168                                     | 31.1     | 150                                    | 27.5     | 147                                        | 27.1     |
| 30-39 years                                                                            | 395                                     | 25.1     | 152                                     | 28.1     | 145                                    | 26.6     | 140                                        | 25.8     |
| 40+ years                                                                              | 308                                     | 19.5     | 124                                     | 22.9     | 105                                    | 19.3     | 102                                        | 18.8     |
| Any hospital affiliation                                                               | 911                                     | 53.0     | 343                                     | 57.5     | 346                                    | 56.2     | 354                                        | 58.8     |
| Board certification in psychiatry                                                      | 1,409                                   | 81.9     | 474                                     | 79.4     | 473                                    | 76.8     | 471                                        | 78.2     |
| History of malpractice claims                                                          | 76                                      | 4.4      | 40                                      | 6.7      | 34                                     | 5.5      | 27                                         | 4.5      |
| History of disciplinary action                                                         | 37                                      | 2.2      | 19                                      | 3.2      | 11                                     | 1.8      | 12                                         | 2.0      |
| Average number of insured outpatients per provider in 2013                             | 99.4                                    |          | 185.9                                   |          | 152.0                                  |          | 158.4                                      |          |
|                                                                                        | <b>Group<br/>Commercial<br/>N=151</b>   |          | <b>Medicare<br/>Advantage<br/>N=117</b> |          | <b>Marketplace<br/>Plans<br/>N=91</b>  |          | <b>Medicaid<br/>Managed Care<br/>N=88</b>  |          |
| <b>Characteristics of psychiatrists<br/>with 300 or more patients<br/>(N=151)</b>      | <b>N</b>                                | <b>%</b> | <b>N</b>                                | <b>%</b> | <b>N</b>                               | <b>%</b> | <b>N</b>                                   | <b>%</b> |
| Average years since medical school graduation (years)                                  | 29.6                                    |          | 31.0                                    |          | 30.0                                   |          | 30.1                                       |          |
| Years since medical school graduation                                                  |                                         |          |                                         |          |                                        |          |                                            |          |
| 0-6 years                                                                              | 1                                       | 0.71     | 0                                       | 0        | 0                                      | 0        | 0                                          | 0        |
| 7-19 years                                                                             | 25                                      | 17.9     | 13                                      | 12.0     | 14                                     | 16.9     | 14                                         | 17.5     |
| 20-29 years                                                                            | 40                                      | 28.6     | 34                                      | 31.5     | 26                                     | 31.3     | 24                                         | 30.0     |
| 30-39 years                                                                            | 49                                      | 35.0     | 41                                      | 38.0     | 27                                     | 32.5     | 25                                         | 31.3     |
| 40+ years                                                                              | 25                                      | 17.9     | 20                                      | 18.5     | 16                                     | 19.3     | 17                                         | 21.3     |
| Any hospital affiliation                                                               | 72                                      | 47.7     | 57                                      | 48.7     | 53                                     | 58.2     | 50                                         | 56.8     |
| Board certification in psychiatry                                                      | 108                                     | 71.5     | 81                                      | 69.2     | 54                                     | 59.3     | 50                                         | 56.8     |
| History of malpractice claims                                                          | 16                                      | 10.6     | 15                                      | 12.8     | 10                                     | 11.0     | 10                                         | 11.4     |
| History of disciplinary action                                                         | 6                                       | 4.0      | 6                                       | 5.1      | 3                                      | 3.3      | 4                                          | 4.5      |
| Average number of insured outpatients per provider in 2013                             | 526.0                                   |          | 548.1                                   |          | 550.7                                  |          | 552.8                                      |          |

outpatients per provider in 2013

---

Notes: Addresses according to the Board of Registration of Medicine and Center for Medicare and Medicaid Services. Data are presented as column percentages except when specified. Characteristics presented represent totals for which data were available.

**Table.** Factors associated with having at least claim for an outpatient paid by non-commercial versus group commercial plans by licensed psychiatrists with Massachusetts addresses.

| <b>Characteristics (N=1,586)</b>                           | <b>OR</b> | <b>95% CI</b> |      | <b>p-value</b> |
|------------------------------------------------------------|-----------|---------------|------|----------------|
| Years since medical school graduation<br>(vs. 30-39 group) |           |               |      |                |
| 0-6                                                        | 0.55      | 0.32          | 0.92 | 0.024          |
| 7-19                                                       | 0.76      | 0.56          | 1.02 | 0.065          |
| 20-29                                                      | 0.88      | 0.66          | 1.16 | 0.358          |
| 30-39                                                      | -         | -             | -    |                |
| 40+                                                        | 0.96      | 0.70          | 1.31 | 0.797          |
| Any hospital affiliation                                   | 1.62      | 1.31          | 1.99 | <0.001         |
| Board certification in psychiatry                          | 0.93      | 0.67          | 1.29 | 0.646          |
| Prior malpractice claim                                    | 1.31      | 0.79          | 2.20 | 0.296          |
| Prior disciplinary action                                  | 1.14      | 0.56          | 2.33 | 0.713          |
| Hospital Referral Region: (vs Boston,<br>Massachusetts)    |           |               |      |                |
| Springfield, Massachusetts                                 | 1.77      | 1.12          | 2.80 | 0.014          |
| Worcester, Massachusetts                                   | 2.10      | 1.30          | 3.38 | 0.002          |

Notes: OR=odds ratio, CI=confidence interval

**Table.** Psychiatrists with an active Massachusetts medical license and Massachusetts address who do and do not participate in Traditional Medicare.

| Number of Out-patients | Psychiatrists with MA practice addresses (N=2,348) |      |                               | Psychiatrists who Participate in Medicare (N=867) |      |                               | Psychiatrists who Do not Participate in Medicare (1,481) |      |                               |
|------------------------|----------------------------------------------------|------|-------------------------------|---------------------------------------------------|------|-------------------------------|----------------------------------------------------------|------|-------------------------------|
|                        | N                                                  | %    | Average Number of Outpatients | N                                                 | %    | Average Number of Outpatients | N                                                        | %    | Average Number of Outpatients |
| 0                      | 505                                                | 21.5 | -                             | 29                                                | 3.3  | -                             | 476                                                      | 32.1 | -                             |
| ≥ 1                    | 1,843                                              | 78.5 | 93.3                          | 838                                               | 96.7 | 137.9                         | 1,005                                                    | 67.9 | 56.1                          |
| ≥ 20                   | 1,145                                              | 48.8 | 145.7                         | 661                                               | 76.2 | 172.4                         | 484                                                      | 32.6 | 109.2                         |
| ≥ 50                   | 726                                                | 30.9 | 211.0                         | 491                                               | 56.6 | 220.4                         | 235                                                      | 15.9 | 191.3                         |
| ≥ 100                  | 462                                                | 19.7 | 291.1                         | 340                                               | 39.2 | 286.3                         | 122                                                      | 8.2  | 304.7                         |
| ≥ 300                  | 151                                                | 6.4  | 526.0                         | 111                                               | 12.8 | 511.8                         | 40                                                       | 2.7  | 565.4                         |
| ≥ 500                  | 65                                                 | 2.8  | 714.1                         | 45                                                | 5.2  | 705.2                         | 20                                                       | 1.4  | 733.9                         |

Notes: Data are presented as column percentages except when specified. We define “participate in Traditional Medicare” as having billed for at least one outpatient in the 2013 Medicare Public Use File.

**Table.** Paid amounts in \$ to psychiatrists licensed in Massachusetts with Massachusetts addresses by insurance type.

| <b>Office Visit Type</b>                          | <b>Group Commercial</b> | <b>Medicare Advantage</b> | <b>Medicaid Managed Care</b> | <b>Marketplace Plans</b> |
|---------------------------------------------------|-------------------------|---------------------------|------------------------------|--------------------------|
| <b>Mid-Level Office Visit (CPT 99213)</b>         |                         |                           |                              |                          |
| Mean ± Standard Deviation                         | 63.92 ± 31.91           | 65.22 ± 16.90             | 54.11 ± 18.77                | 31.71 ± 17.51            |
| Median                                            | 66                      | 69.88                     | 52.37                        | 27.42                    |
| % zero-dollar claims                              | 12.8%                   | 11.7%                     | 72.7%                        | 29.8%                    |
| <b>Higher Complexity Office Visit (CPT 99214)</b> |                         |                           |                              |                          |
| Mean ± Standard Deviation                         | 97.32 ± 45.56           | 89.86 ± 18.84             | 77.67 ± 18.47                | 48.58 ± 27.88            |
| Median                                            | 103.67                  | 96.56                     | 77.46                        | 40.12                    |
| % zero-dollar claims                              | 11.6%                   | 10.2%                     | 51.0%                        | 21.4%                    |

Notes: paid amounts (\$) are averaged excluding claims with negative or zero values. Data for Medicaid Managed Care and Marketplace plans are limited as many of these plans may have capitated provider contracts with large numbers of zero-dollar claims. Abbreviation: CPT – current procedural terminology.

**Figure.** Number of claims per patient per psychiatrist with an active in Massachusetts medical license and a Massachusetts address.

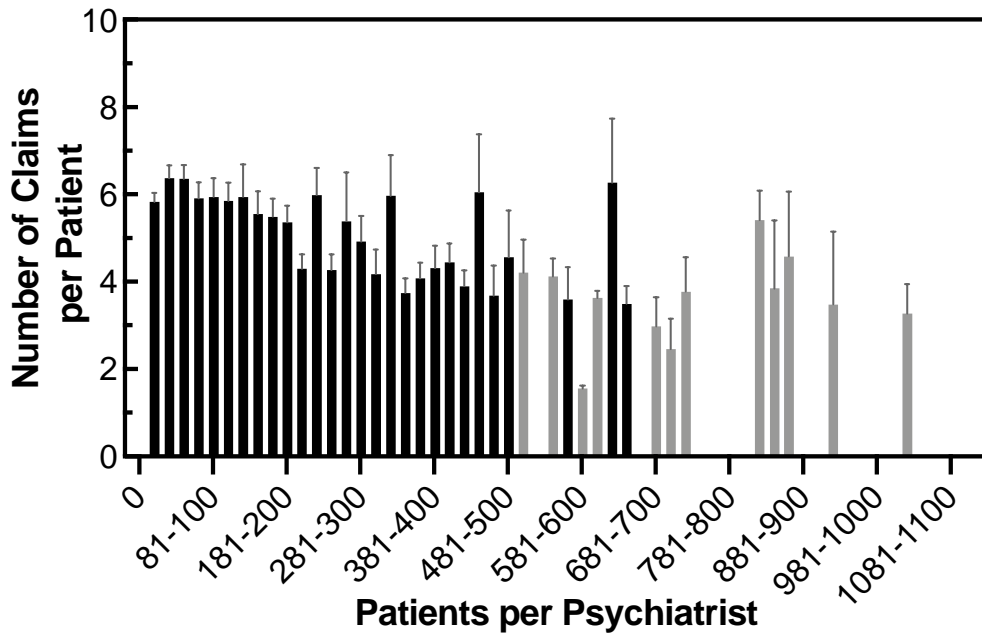

Note: this figure depicts the average number of claims per patient for psychiatrists with each range of outpatients. Bars shown are standard errors. Ratios of one were excluded from the figure. Bars comprised of fewer than five psychiatrists are represented in gray.
